# Supplementary material for: Are beta blockers effective in preventing stroke-associated infections? - a systematic review and meta-analysis
Source: publisher site journal article supplement (doi:10.18632/aging.204086), 2022-05-18
Supplement: Supplementary file [file aging-v14i10-204086-supplementary-material-SD4.pdf]

## SUPPLEMENTARY TABLES

**Supplementary Table 3. Result of quality assessment using the Newcastle-Ottawa scale for cohort study.**

| Author<br>(Year)        | Selection                                |                                     |                           |                                                                          | Comparability<br>of cohorts on<br>the basis of<br>the design or<br>analysis | Exposure              |                                                |                                 | Scores |
|-------------------------|------------------------------------------|-------------------------------------|---------------------------|--------------------------------------------------------------------------|-----------------------------------------------------------------------------|-----------------------|------------------------------------------------|---------------------------------|--------|
|                         | Representativeness of the exposed cohort | Selection of the non-exposed cohort | Ascertainment of exposure | Demonstration that outcome of interest was not present at start of study |                                                                             | Assessment of outcome | Was follow-up long enough for outcome to occur | Adequacy of follow up of cohort |        |
| Westendorp, W. F (2016) | ☆                                        | ☆                                   | ☆                         | ☆                                                                        | ☆☆                                                                          | ☆                     | ☆                                              | -                               | 8      |

**Supplementary Table 4. Result of quality assessment using the Newcastle-Ottawa scale for case-control study.**

| Author<br>(Year)   | Selection                    |                                |                       |                        | Comparability<br>control for<br>important<br>factor | Exposure                  |                                                     |                   | Scores |
|--------------------|------------------------------|--------------------------------|-----------------------|------------------------|-----------------------------------------------------|---------------------------|-----------------------------------------------------|-------------------|--------|
|                    | Adequate definition of cases | Representativeness of the case | Selection of controls | Definition of controls |                                                     | Ascertainment of exposure | Same method of ascertainment for cases and controls | Non-response rate |        |
| Maier, I. L (2018) | ☆                            | ☆                              | ☆                     | ☆                      | ☆☆                                                  | ☆                         | ☆                                                   | -                 | 8      |
| Kalita, J (2013)   | ☆                            | ☆                              | ☆                     | -                      | ☆                                                   | ☆                         | ☆                                                   | -                 | 7      |
| Starr, J. B (2017) | ☆                            | ☆                              | ☆                     | ☆                      | ☆                                                   | ☆                         | ☆                                                   | -                 | 6      |
| Sykora, M (2015)   | -                            | ☆                              | -                     | ☆                      | ☆                                                   | ☆                         | ☆                                                   | -                 | 5      |
| Dziedzic, T (2007) | ☆                            | ☆                              | ☆                     | ☆                      | ☆                                                   | -                         | ☆                                                   | -                 | 6      |
